# Supplementary material for: Radical chemoradiotherapy for superficial esophageal cancer complicated with liver cirrhosis
Source: PeerJ journal article supplement (doi:10.7717/peerj.18065), 2024-09-11
Supplement: supplemental_file.xls [file supplemental_file.xls]

## Sheet: Sheet1
table1
Patients	Age,	Sex	Drinker	Cause of liver cirrhosis	Child-Pugh score	PT，s	INR	PLT，×10^9/L	ALB，g/L	Tumor location of electronic gastroscope， cm	Tumor location of digestive tract radiography	ECOG	Liver hardness number， Kpa	Pathology	T stage	The stage of esophageal varices
1	52	Male	Yes	Hepatitis B	7	16.7	1.48	59	39.8	25-30	5-7thoracic vertebrae	1	34.9	Squamous cell carcinoma	T1	GⅡ
2	64	Male	Yes	Hepatitis B	5	13.2	1.14	120	38.7	30-35	11-12thoracic vertebrae	0	36.2	Squamous cell carcinoma	T1	GⅢ
3	70	Male	Yes	Alcoholic Hepatitis	6	12	1.05	125	33.3	20-22	3-4thoracic vertebrae	1	28.7	Squamous cell carcinoma	T1	GⅠ
4	81	Male	Yes	Alcoholic Hepatitis	7	14.2	1.25	203	30	23-26	6-7thoracic vertebrae	1	26.7	Small cell neuroendocrine carcinoma	T2	GⅠ
5	77	Male	Yes	Hepatitis B	5	11.8	0.97	165	38.6	28-33	7-9thoracic vertebrae	0	32.5	Adenocarcinoma	T3	GⅡ
6	66	Female	No	Hepatitis B	6	10.5	0.92	76	33.7	25-27	7thoracic vertebrae	1	21.3	Squamous cell carcinoma	T2	GⅠ
7	51	Male	Yes	Hepatitis C	7	11.6	0.95	197	22.7	30-32	8-9thoracic vertebrae	1	30.2	Squamous cell carcinoma	T2	GⅡ
8	56	Female	No	Hepatitis B	5	10.1	0.83	104	44	23-30	4-7thoracic vertebrae	0	23.6	Squamous cell carcinoma	T2	GⅠ
9	78	Male	Yes	Alcoholic Hepatitis	5	11.5	1.01	275	42.8	25-28	5-6thoracic vertebrae	0	24.3	Squamous cell carcinoma	T3	GⅠ
10	73	Male	No	Hepatitis B	6	10.5	0.91	73	36.1	22-25	4-5thoracic vertebrae	1	25.7	Squamous cell carcinoma	T3	GⅠ
11	67	Female	No	Hepatitis B	7	13.3	1.16	109	35	20-25	3-5thoracic vertebrae	1	32.6	Squamous cell carcinoma	T2	GⅡ
table2
Patients	GTV, cm3	CTV, cm3	EV volume,cm3	Liver volume,cm3	Radiotherapy doseage,Gy	combination therapy	V20	V30	V40	Complete the radiotherapy or not	Best overall response
1	29.7	154.3	8.3	1240	95%PGTV 60Gy/2.0Gy/30F	Concurrent PF	0.415	0.3798	0.378	Yes	CR
2	33	158.8	19.7	1192	95%PGTV 54.0Gy/1.8Gy/30F	Concurrent S-1	0.9314	0.9153	0.9153	Yes	-
3	19.6	123.4	7.1	1071.5	99%GTV 63Gy/2.1Gy/30F	Concurrent S-1	0.2102	0.2076	0.2037	Yes	CR
4	28.7	142.3	12.3	1091.2	95%PGTV 54.0Gy/1.8Gy/30F	-	0.467	0.4553	0.4527	No,-2F	SD
5	31.6	157.7	9.2	977.6	95%PGTV 54.0Gy/1.8Gy/30F	Concurrent S-1	0.7216	0.7164	0.7123	Yes	PR
6	20.5	148	9	886.3	95%PGTV 60.2Gy/2.15Gy/28F	Concurrent PF	0.4089	0.3876	0.3798	Yes	PR
7	21	132.3	15.2	987.8	95%PGTV 60Gy/2.0Gy/30F	Concurrent TP	0.6522	0.6387	0.631	Yes	SD
8	35	160.5	11.2	1112	95%PGTV 60.2Gy/2.15Gy/28F	Concurrent PF	0.5012	0.4756	0.4711	Yes	PR
9	23.9	135.6	9.5	1002.6	95%PGTV 63Gy/2.1Gy/30F	-	0.398	0.3755	0.3667	Yes	SD
10	28	136	11	1050	95%PGTV 60Gy/2.0Gy/30F	Adjutant 5-Fu	0.3122	0.3062	0.3023	Yes	PR
11	32.8	155.2	13.4	990.1	95%PGTV 63Gy/2.1Gy/30F	Adjutant PF	0.273	0.2657	0.262	No,-5F	PR
table3
Treatment-related adverse events	Grade1-2	Grade3-4	Grade5
Fatigue	2(18.2%)
Nausea	3(27.3%)
Vomiting	3(27.3%)
Anorexia	2(18.2%)
Diarrhea	3(27.3%)
Anemia	3(27.3%)
White blood cell decreased	4(36.4%)
Neutrophil count decreased	5(45.5%)
Lymphocyte count decreased	6(54.5%)	1(9.1%)
Platelet count decreased	4(36.4%)
Esophageal stricture	2（18.2%）
Hemorrhage	1(9.1%)		1(9.1%)
Radiation esophagitis	5(45.5%)	1(9.1%)
Radiation pneumonitis	1(9.1%)
Radiodermatitis	3(27.3%)
