# Supplementary figures and images for: Radical chemoradiotherapy for superficial esophageal cancer complicated with liver cirrhosis
Source: PeerJ journal article supplement (doi:10.7717/peerj.18065), 2024-09-11

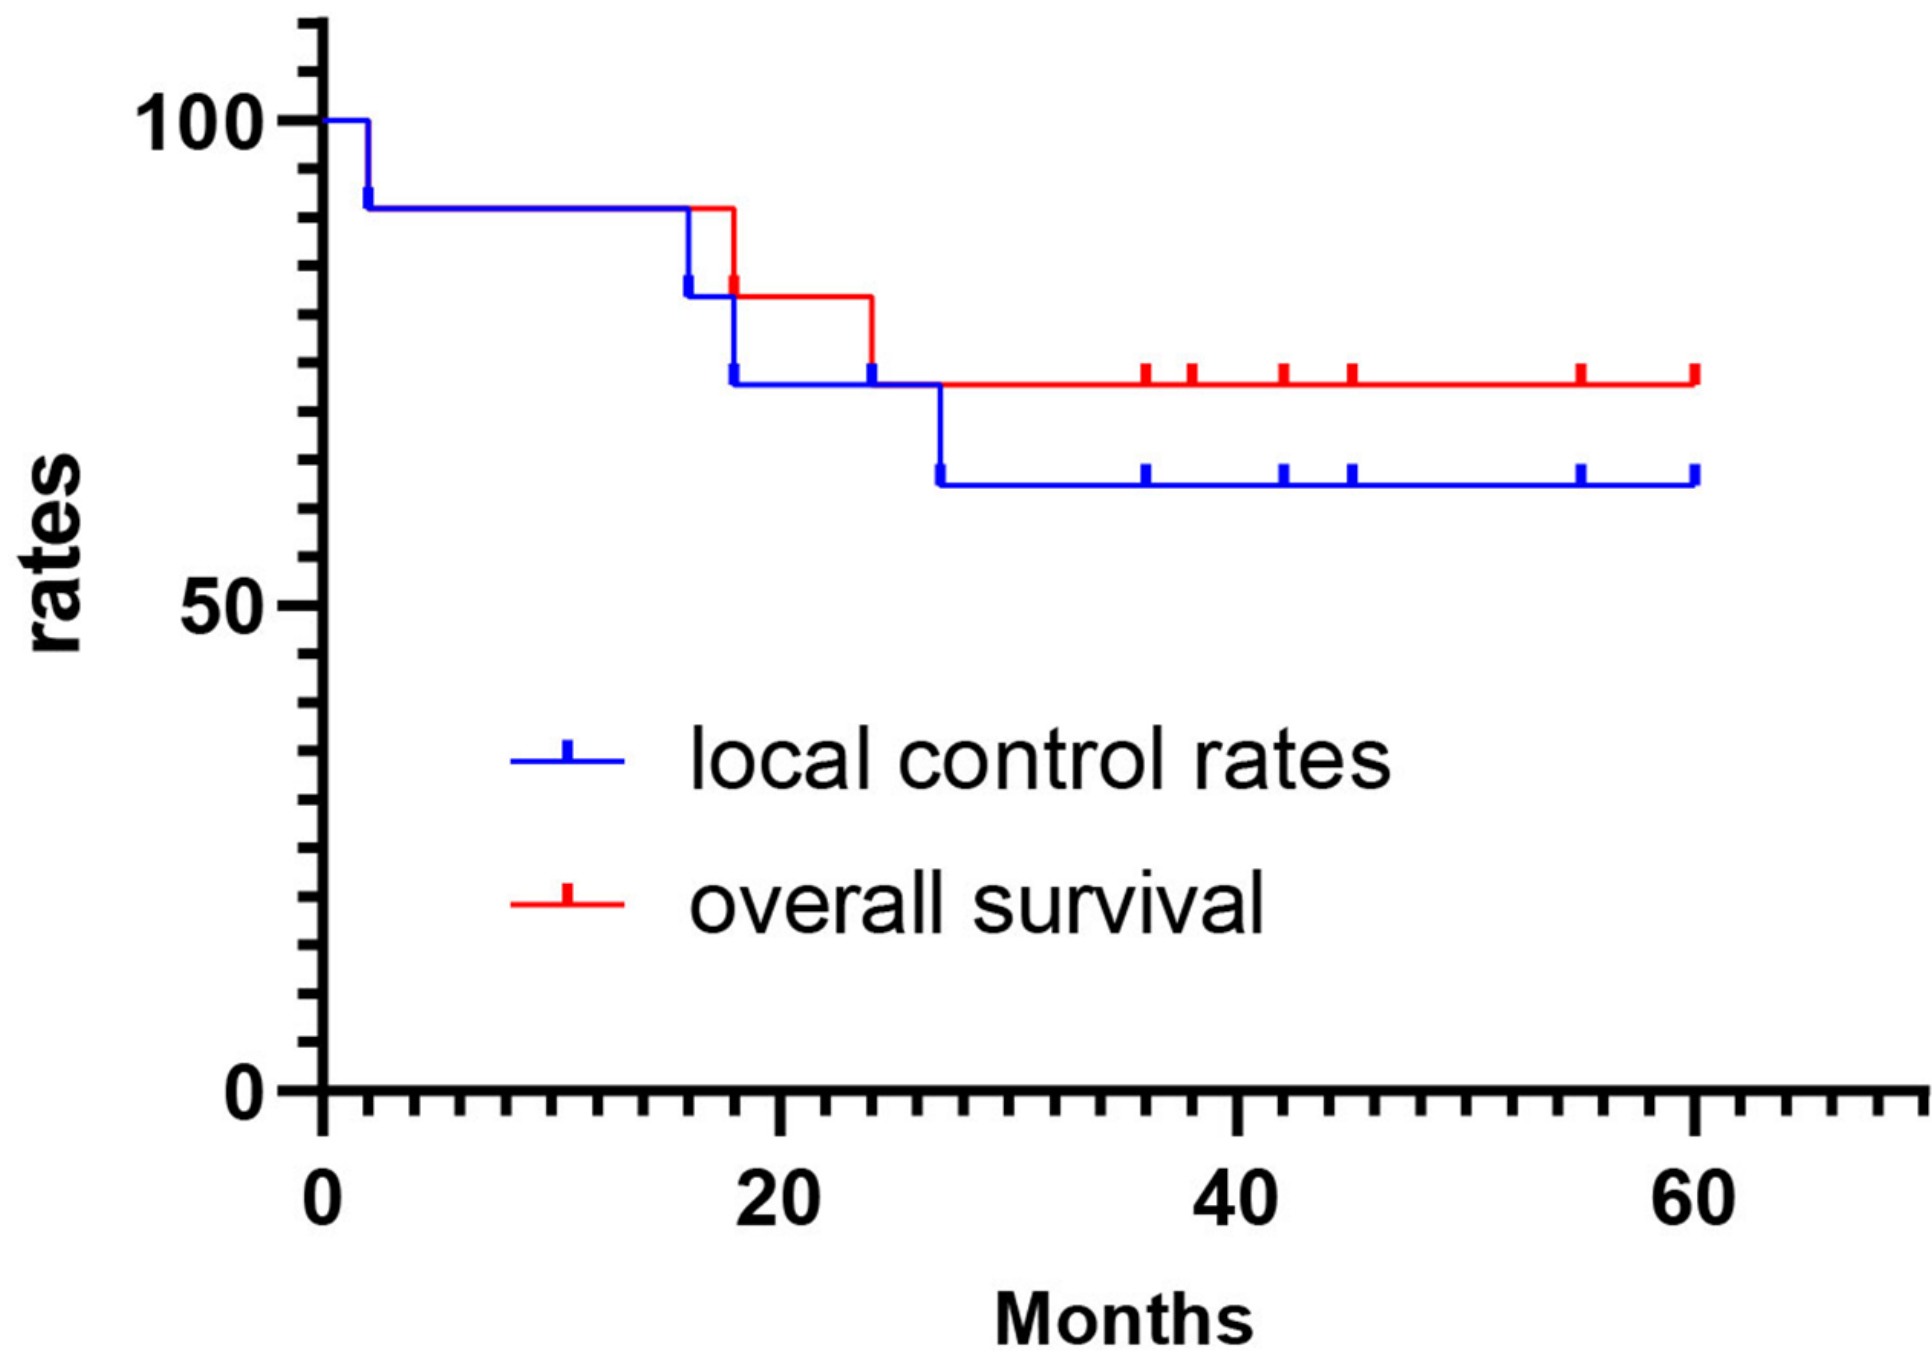

Supplement: Figure_S2.pdf [file Figure_S2.pdf]
